# Supplementary material for: Marilones A–C, phthalides from the sponge-derived fungus Stachylidium sp.
Source: publisher site journal article supplement (doi:10.3762/bjoc.7.192), 2011-12-05

## Supporting Information

for

### **Marilones A–C, phthalides from the sponge-derived fungus *Stachylidium***

**sp.**

Celso Almeida<sup>1</sup>, Stefan Kehraus<sup>1</sup>, Miguel Prudêncio<sup>2</sup> and Gabriele M. König\*<sup>1</sup>

Address: <sup>1</sup>Institute for Pharmaceutical Biology, University of Bonn, Nussallee 6, D-53115 Bonn, Germany and <sup>2</sup> Instituto de Medicina Molecular, Malaria Unit, Faculdade de Medicina, Universidade de Lisboa, Av. Prof. Egas Moniz, 1649-028 Lisboa, Portugal

Email: Gabriele M. König\* - g.koenig@uni-bonn.de

\*Corresponding author

### **Spectroscopic data and other relevant information for compounds 1–4.**

|                      |                                                                                                                                                                       |    |
|----------------------|-----------------------------------------------------------------------------------------------------------------------------------------------------------------------|----|
| <b>Figure S1</b>     | <sup>1</sup> H NMR (300 MHz, CD <sub>3</sub> COCD <sub>3</sub> ) of compound <b>1</b> .....                                                                           | 3  |
| <b>Figure S2</b>     | <sup>13</sup> C NMR (75 MHz, CD <sub>3</sub> COCD <sub>3</sub> ) of compound <b>1</b> .....                                                                           | 3  |
| <b>Figure S3</b>     | <sup>1</sup> H NMR (300 MHz, CD <sub>3</sub> COCD <sub>3</sub> ) of compound <b>2</b> .....                                                                           | 4  |
| <b>Figure S4</b>     | <sup>13</sup> C NMR (75 MHz, CD <sub>3</sub> COCD <sub>3</sub> ) of compound <b>2</b> .....                                                                           | 4  |
| <b>Figure S5</b>     | <sup>1</sup> H NMR (300 MHz, CD <sub>3</sub> COCD <sub>3</sub> ) of compound <b>3</b> .....                                                                           | 5  |
| <b>Figure S6</b>     | <sup>13</sup> C NMR (75 MHz, CD <sub>3</sub> COCD <sub>3</sub> ) of compound <b>3</b> .....                                                                           | 5  |
| <b>Figure S7</b>     | Key HMBC correlations for compounds <b>1</b> – <b>3</b> .....                                                                                                         | 6  |
| <b>Figure S8</b>     | HREIMS data for compound <b>1</b> .....                                                                                                                               | 6  |
| <b>Figure S9</b>     | HREIMS data for compound <b>2</b> .....                                                                                                                               | 7  |
| <b>Figure S10</b>    | HREIMS data for compound <b>3</b> .....                                                                                                                               | 7  |
| <b>Figure S11</b>    | Antiproliferative activity data for compounds <b>1</b> and <b>3</b> .....                                                                                             | 8  |
| <b>Figure S12a–c</b> | Antiplasmodial activity data for compounds <b>1</b> and <b>3</b> .....                                                                                                | 9  |
| <b>Figure S13</b>    | Ki value determination of the antagonistic effect of Marilone B against the serotonin receptor 5HT2B.....                                                             | 11 |
| <b>S14</b>           | Detailed description of the negative biological activity assays.....                                                                                                  | 11 |
| <b>Table S1</b>      | 1D and 2D NMR spectroscopic data for compound <b>1</b> .....                                                                                                          | 13 |
| <b>Table S2</b>      | 1D and 2D NMR spectroscopic data for compound <b>2</b> .....                                                                                                          | 14 |
| <b>Table S3</b>      | 1D and 2D NMR spectroscopic data for compound <b>3</b> .....                                                                                                          | 15 |
| <b>Table S4</b>      | <sup>1</sup> H-NMR spectroscopic data comparison of compound <b>4</b> with silvaticol and nidulol.....                                                                | 16 |
| <b>Table S5</b>      | <sup>1</sup> H-NMR spectroscopic data comparison of compounds <b>1</b> and <b>3</b> with silvaticol and nidulol derivatives.....                                      | 17 |
| <b>Figure S15</b>    | Tetraketide nature of the phthalides nidulol (A) and silvaticol (B), and hypothetical biosynthetic pathways (C, D) for marilones A and B ( <b>1</b> , <b>2</b> )..... | 18 |

**Figure S1:**  $^1\text{H}$  NMR (300 MHz,  $\text{CD}_3\text{COCD}_3$ ) of compound **1**.

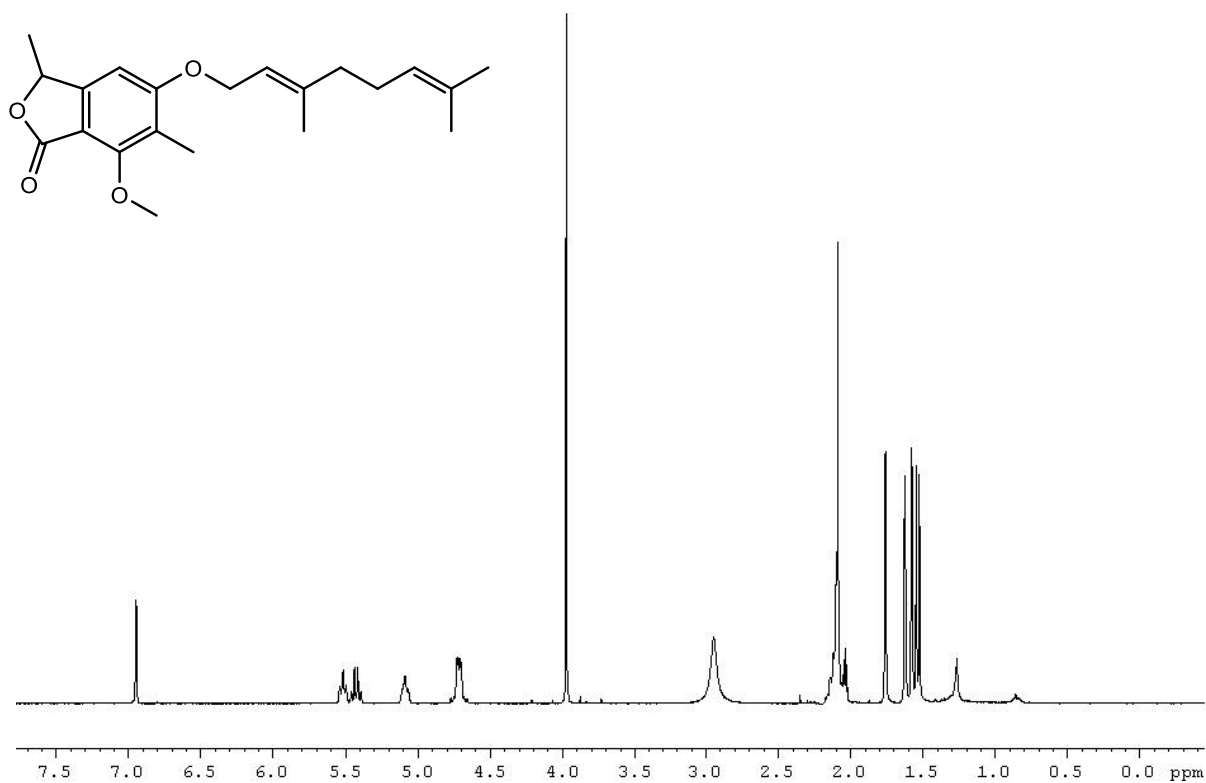

**Figure S2:**  $^{13}\text{C}$  NMR (75 MHz,  $\text{CD}_3\text{COCD}_3$ ) of compound **1**.

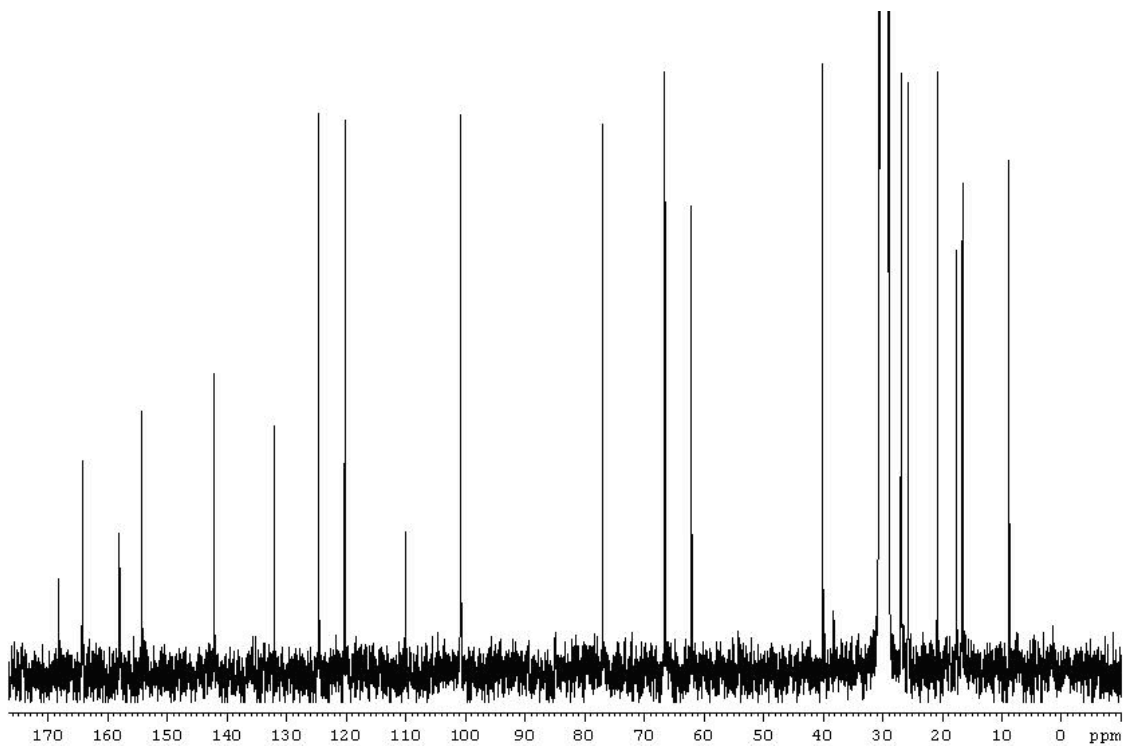

**Figure S3:**  $^1\text{H}$  NMR (300 MHz,  $\text{CD}_3\text{COCD}_3$ ) of compound **2**.

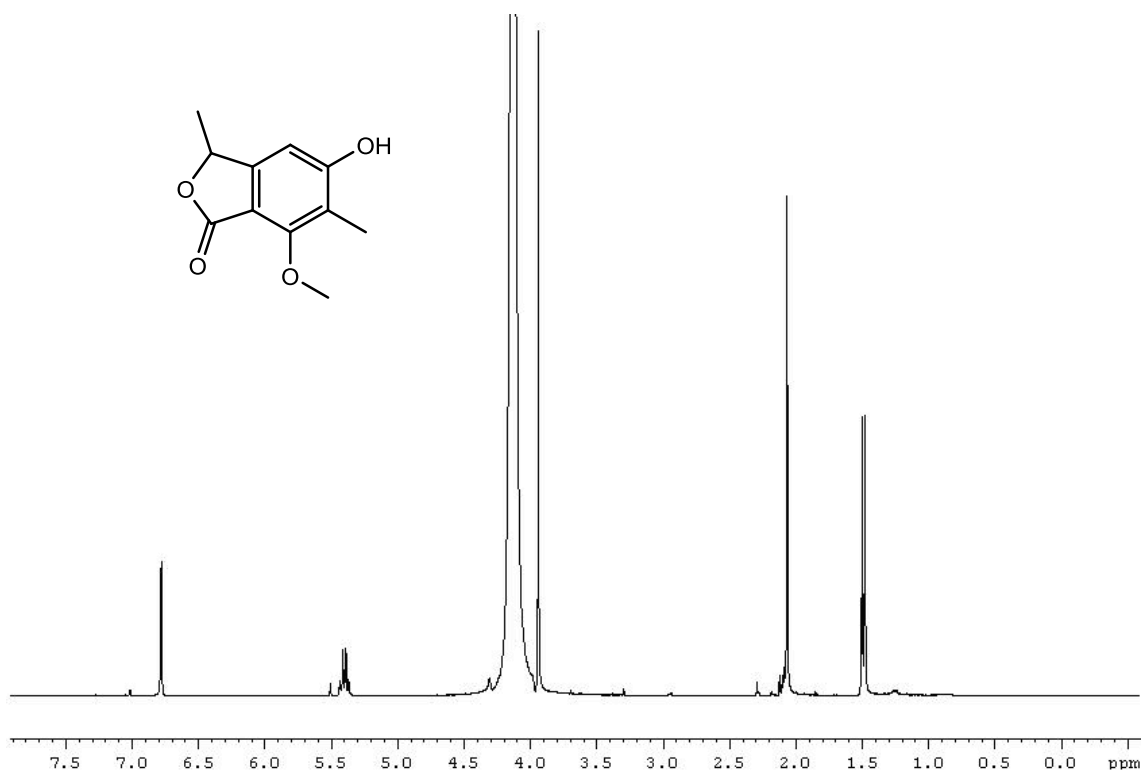

**Figure S4:**  $^{13}\text{C}$  NMR (75 MHz,  $\text{CD}_3\text{COCD}_3$ ) of compound **2**.

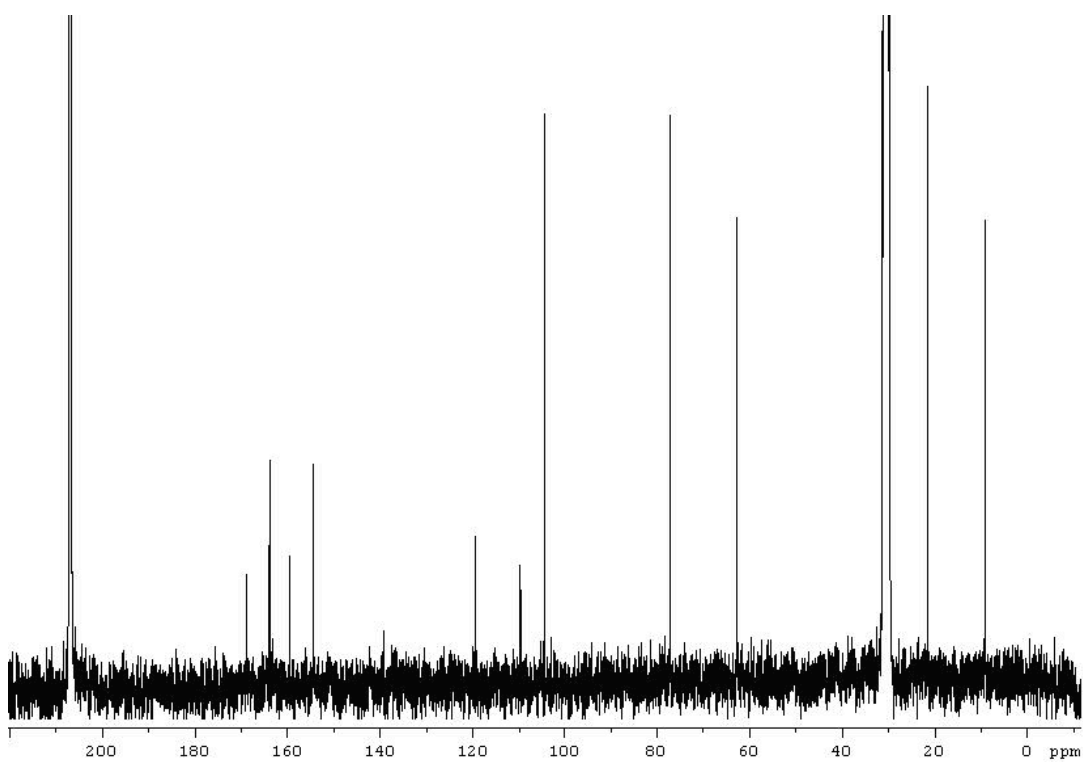

**Figure S5:**  $^1\text{H}$  NMR (300 MHz,  $\text{CD}_3\text{COCD}_3$ ) of compound **3**.

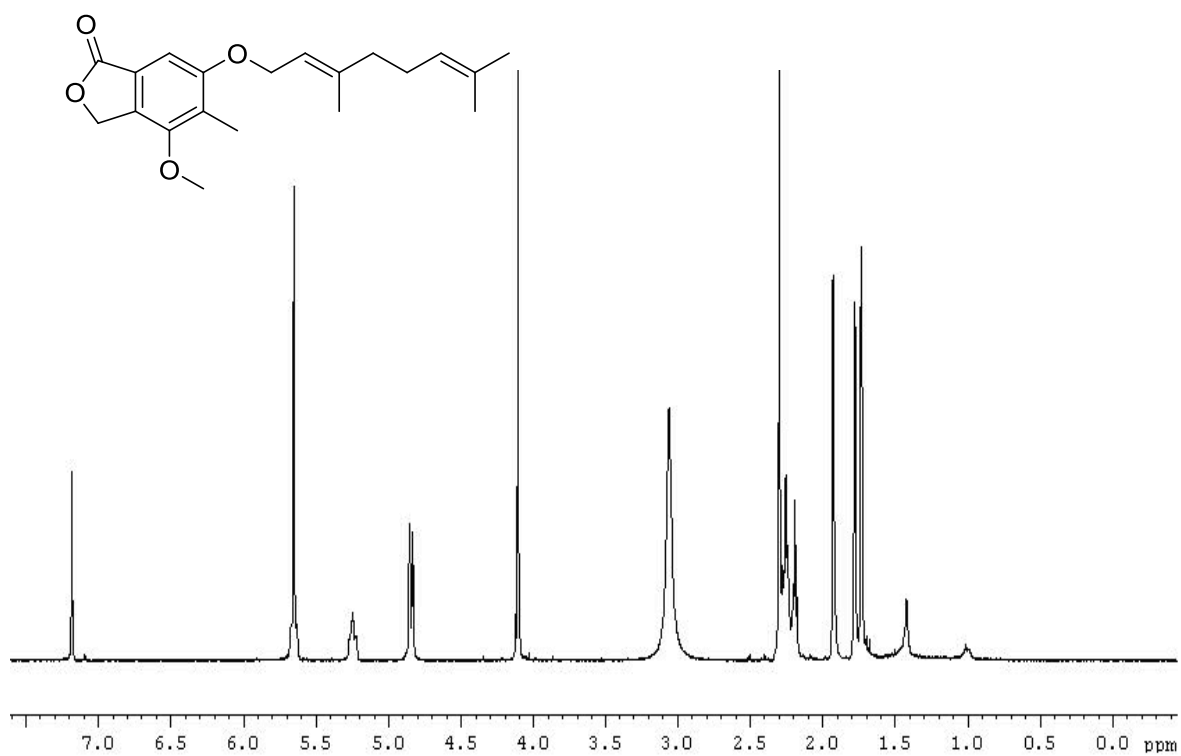

**Figure S6:**  $^{13}\text{C}$  NMR (75 MHz,  $\text{CD}_3\text{COCD}_3$ ) of compound **3**.

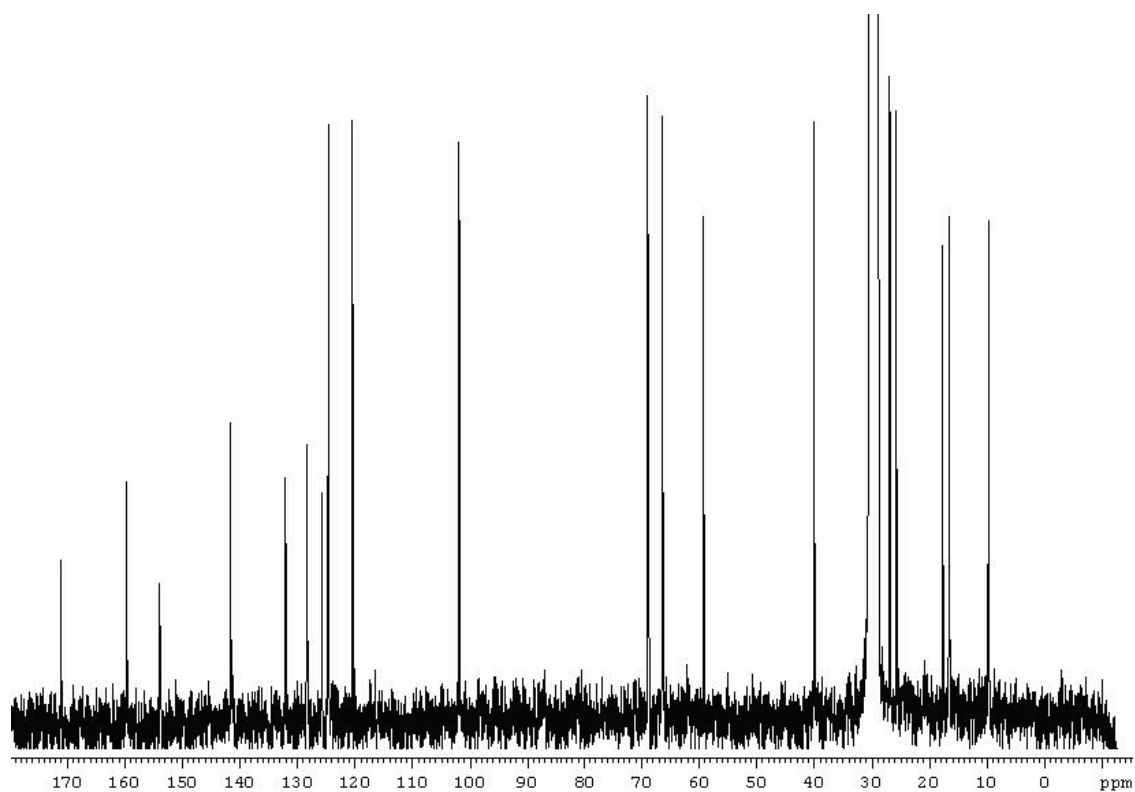

**Figure S7:** Key HMBC correlations for compounds **1-3**.

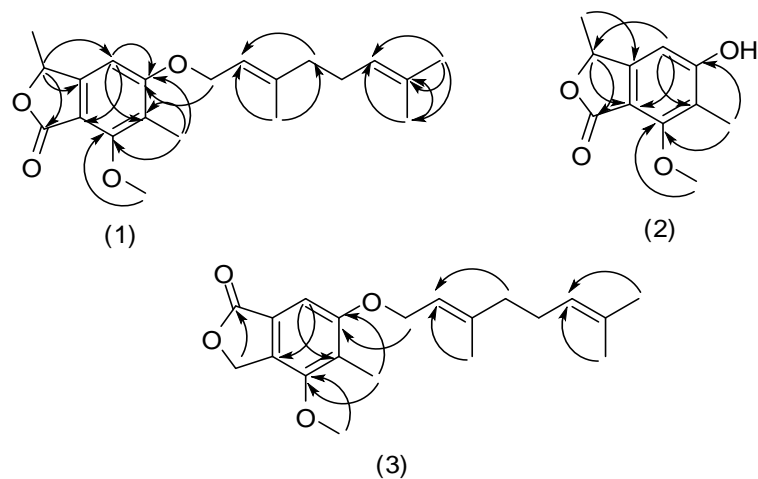

**Figure S8:** HREIMS data for compound **1**.

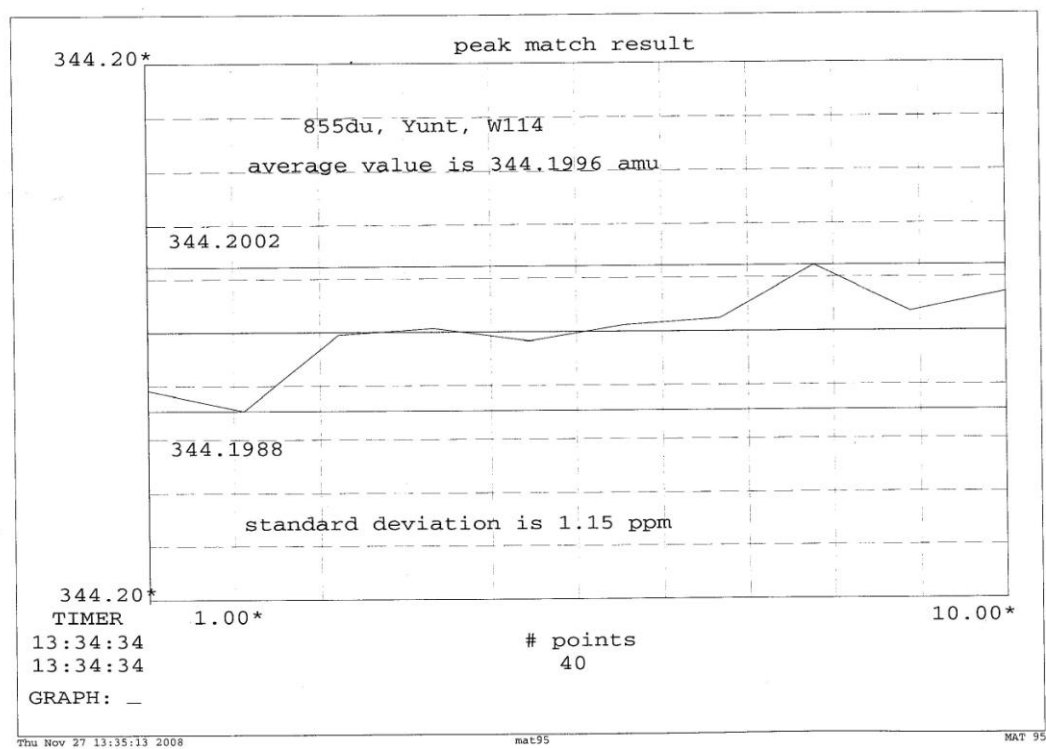

Figure S9: HREIMS data for compound 2.

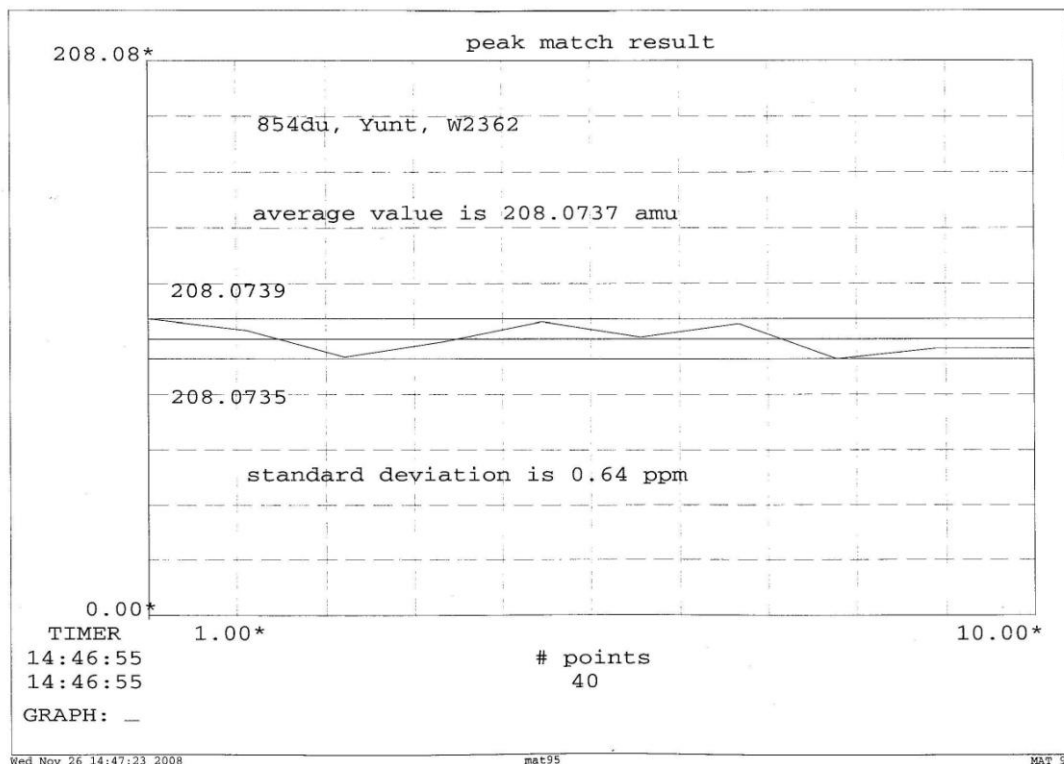

Figure S10: HREIMS data for compound 3.

| USER LIST FILE (4x500): 853dul |            |         |         | SAVE    |
|--------------------------------|------------|---------|---------|---------|
| 1:                             | 330.18349  | 0.00000 | 0.00000 | 0.00000 |
| 2:                             | 330.18403  | 0.00000 | 0.00000 | 0.00000 |
| 3:                             | 330.18132  | 0.00000 | 0.00000 | 0.00000 |
| 4:                             | 330.18427  | 0.00000 | 0.00000 | 0.00000 |
| 5:                             | 0.00000    | 0.00000 | 0.00000 | 0.00000 |
| 6:                             | 0.00000    | 0.00000 | 0.00000 | 0.00000 |
| 7:                             | 0.00000    | 0.00000 | 0.00000 | 0.00000 |
| 8:                             | 0.00000    | 0.00000 | 0.00000 | 0.00000 |
| 9:                             | 0.00000    | 0.00000 | 0.00000 | 0.00000 |
| 10:                            | 0.00000    | 0.00000 | 0.00000 | 0.00000 |
| 11:                            | 0.00000    | 0.00000 | 0.00000 | 0.00000 |
| 12:                            | 0.00000    | 0.00000 | 0.00000 | 0.00000 |
| 13:                            | 0.00000    | 0.00000 | 0.00000 | 0.00000 |
| 14:                            | 0.00000    | 0.00000 | 0.00000 | 0.00000 |
| 15:                            | 0.00000    | 0.00000 | 0.00000 | 0.00000 |
| 16:                            | 0.00000    | 0.00000 | 0.00000 | 0.00000 |
| 17:                            | 0.00000    | 0.00000 | 0.00000 | 0.00000 |
| 18:                            | 0.00000    | 0.00000 | 0.00000 | 0.00000 |
| 19:                            | 0.00000    | 0.00000 | 0.00000 | 0.00000 |
| 20:                            | 0.00000    | 0.00000 | 0.00000 | 0.00000 |
| LINK                           | NONE       | NONE    | NONE    | NONE    |
| SIZE                           | 4.00000    | 0.00000 | 0.00000 | 0.00000 |
| MEAN                           | 330.18328  | 0.00000 | 0.00000 | 0.00000 |
| SUM                            | 1320.73312 | 0.00000 | 0.00000 | 0.00000 |
| S.D.                           | 0.00134    | 0.00000 | 0.00000 | 0.00000 |
| MAX                            | 330.18427  | 0.00000 | 0.00000 | 0.00000 |
| MIN                            | 330.18132  | 0.00000 | 0.00000 | 0.00000 |
| ULIST:                         | —          |         |         |         |

Wed Nov 26 15:10:58 2008 mat95 MAT 95

**Figure S11:** Antiproliferative activity data for compounds **1** and **3**.

Growth delaying activity (represented by  $GI_{50}$ ), cytostatic activity (represented by TGI) and cytotoxic activity (represented by  $LC_{50}$ ) were observed.  $GI_{50}$  is different from the  $IC_{50}$  in that it contains a correction for the starting population. Results in  $\mu\text{M}$ .

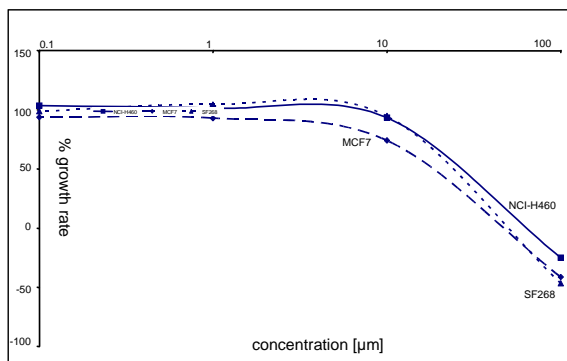

$GI_{50}$  compound **1**

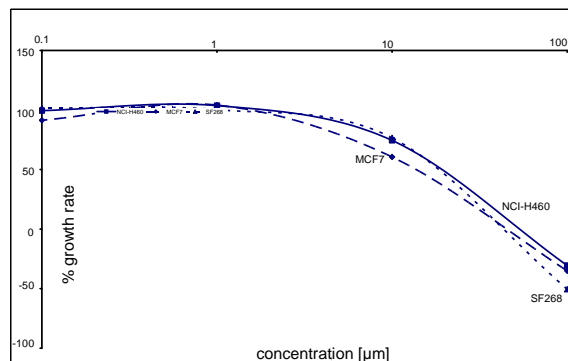

$GI_{50}$  compound **3**

| CELL LINES |           | (1)  | (3)  | Etoposide |
|------------|-----------|------|------|-----------|
| NCI-H460   | $GI_{50}$ | 42.9 | 31.0 | 0.4       |
|            | TGI       | 80.9 | 73.8 | 22.4      |
|            | $LC_{50}$ | >100 | >100 | 124.2     |
| MCF7       | $GI_{50}$ | 28.8 | 20.0 | 22.8      |
|            | TGI       | 67.7 | 67.0 | 118.0     |
|            | $LC_{50}$ | >100 | >100 | 213.1     |
| SF268      | $GI_{50}$ | 38.4 | 28.9 | 7.7       |
|            | TGI       | 70.2 | 64.2 | 90.4      |
|            | $LC_{50}$ | >100 | 99.6 | 201.4     |

Cancer cell lines: NCI-H460/lung, MCF7/breast and SF268/CNS  
Average values in main article.



**Figure S12a–c:** Antiplasmodial activity data for compounds **1** and **3**.

The bioactivity test monitors the inhibition of the infection of *Plasmodium berghei* liver stages. The parasite expresses luciferase, thus, the infection is measured by luminescence (Bars); the cellular density (i.e., the nontoxicity of the compounds) is measured by AlamarBlue fluorescence.

The tests were performed in triplicate measurements per compound concentration.

Samples were dissolved in acetone, which was also tested on its own. Results show that the solvent has no effect on cell confluency or the infection (the X axis of the acetone graphic depicts the amount of acetone present in the corresponding compound concentrations). The data show that whereas Marilone B does not affect infection of liver cells by *Plasmodium berghei*, Marilone A displays a dose-dependent effect on infection, with an IC<sub>50</sub> of 12.1  $\mu$ M, and without any cell toxicity at the concentrations used in the assay.

**Figure S12a:** Acetone measurements.

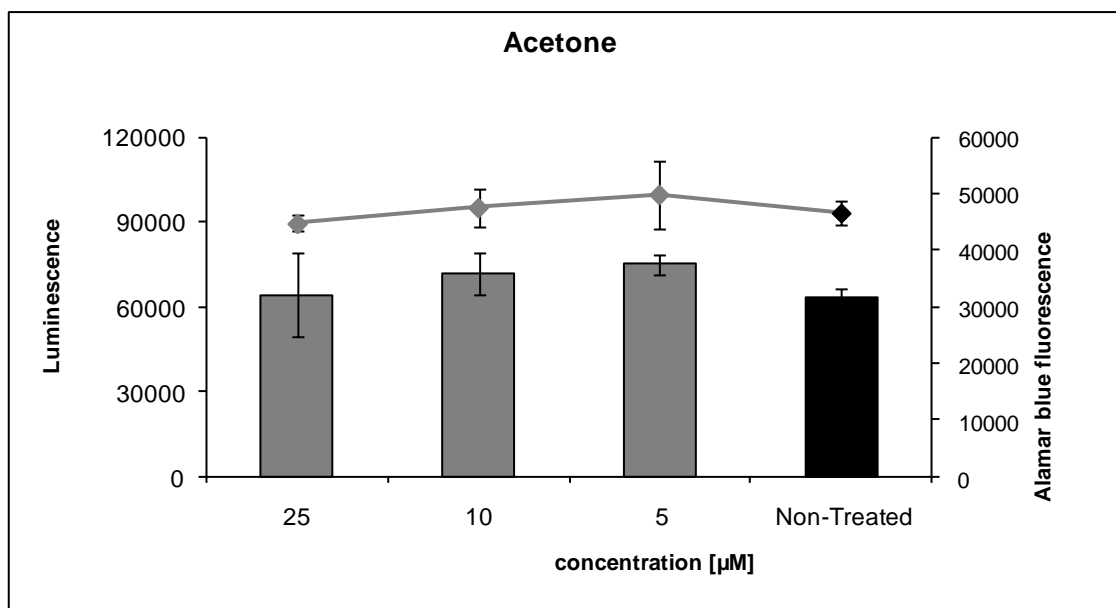

Figure S12b: Compound 1.

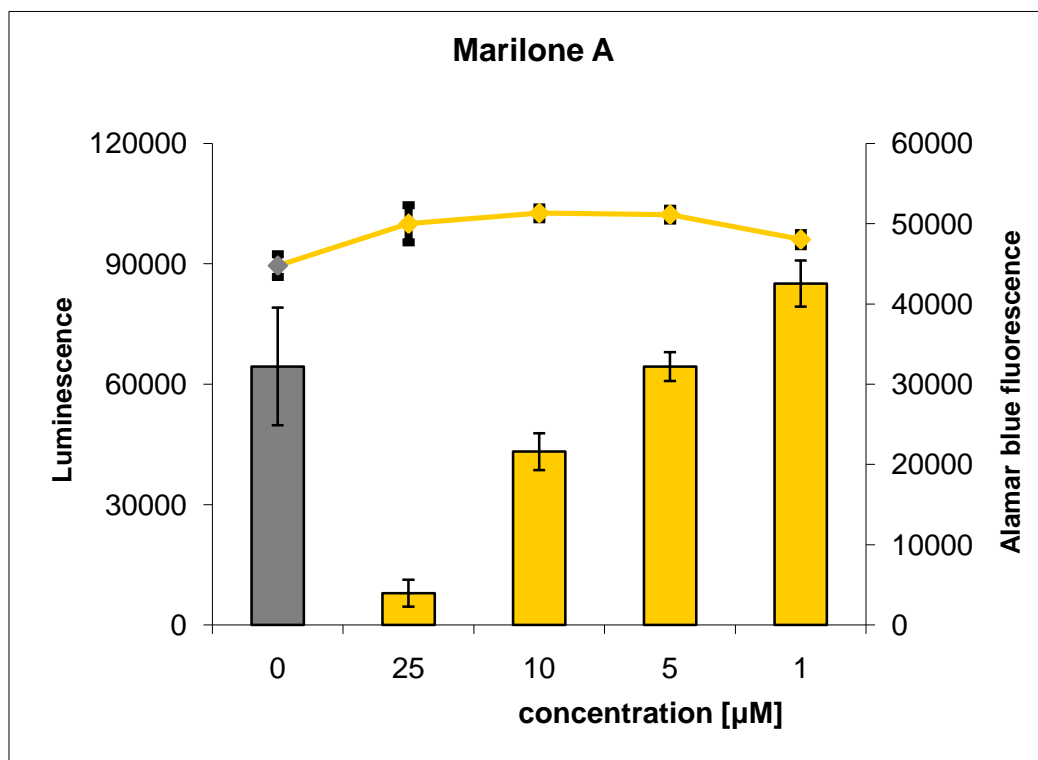

Figure S12c: Compound 3.

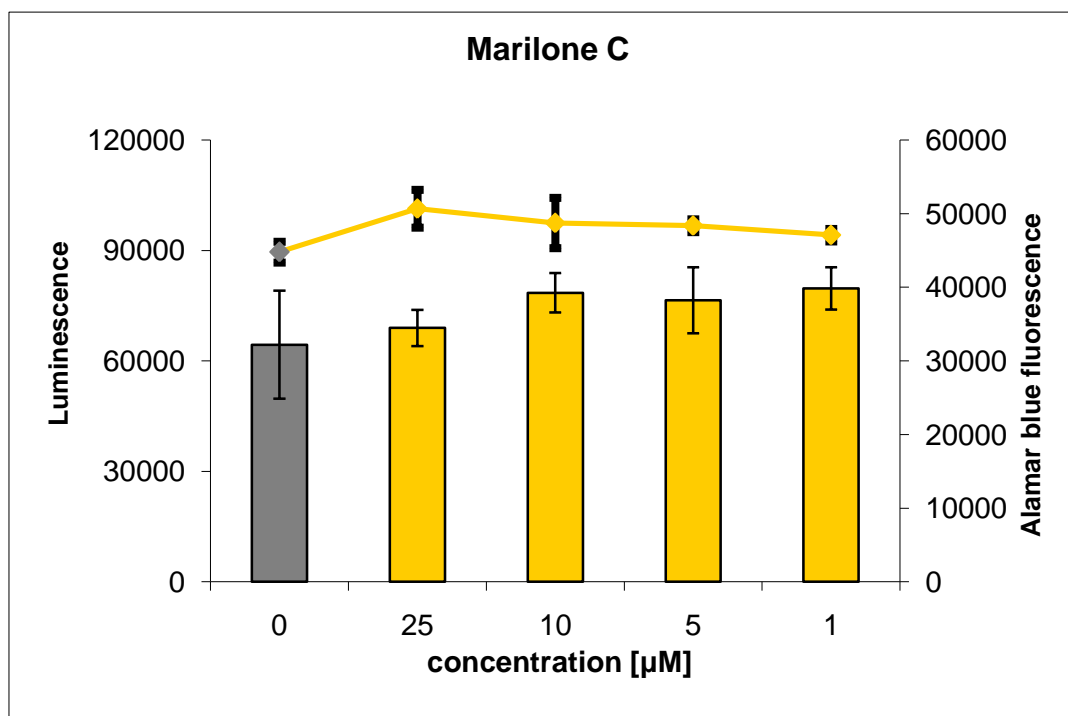

**Figure S13:**  $K_i$  value determination of the antagonistic effect of Marilone B (compound 2) against the serotonin receptor 5HT<sub>2B</sub>.

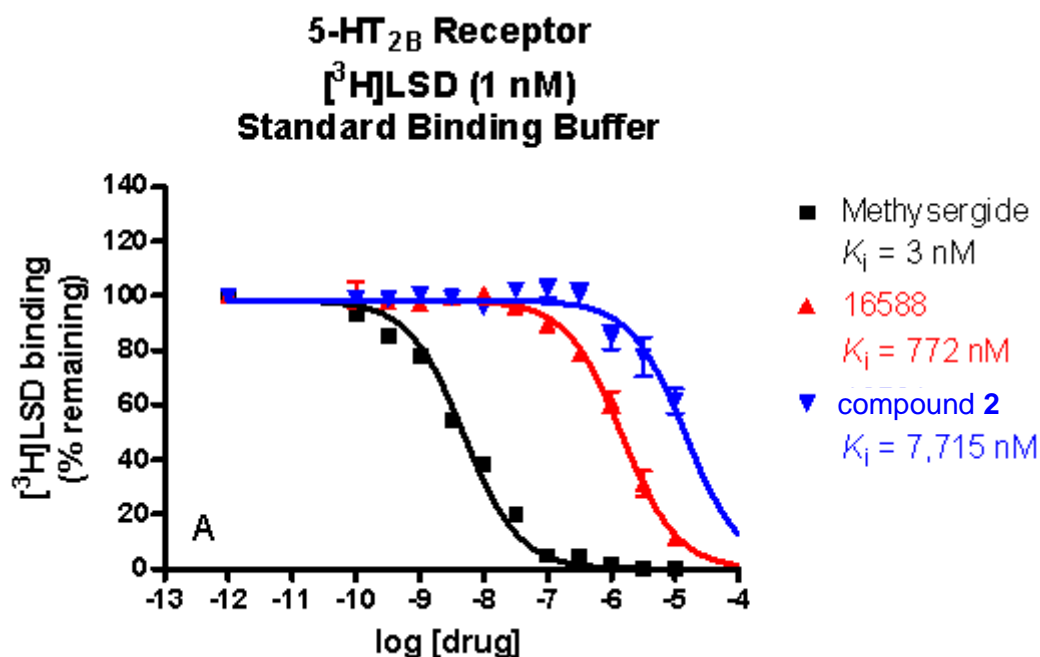

**S14** Detailed description of the negative biological activity assays

Marilones A, B and C were tested in protein kinases (DYRK1A and CDK5) inhibition activity assay, inhibition of the viral HIV-1- and HIV-2-induced cytopathogenic effect in MT-4 cells, in antibacterial (*Escherichia coli*, *Bacillus megaterium*), antifungal (*Mycotypha microspora*, *Eurotium rubrum*, and *Microbotryum violaceum*), and antialgal (*Chlorella fusca*) assays at the 50  $\mu\text{g/mL}$  disc level; they were evaluated for inhibition of the following panel of proteases: Chymotrypsin, trypsin, the protease elastase HLE, papain, porcine cease and acetylcholine esterase (tested at the 100  $\mu\text{M}$  level) but exhibited no activity in any of these tests.

Marilones A and C were also evaluated against 3T3-L1 murine adipocytes assay and exhibited no activity.

Marilones A and B were evaluated against three subtypes of Influenza A virus (H1N1, H5N1 and H3N2), Influenza B virus (Flu B) and exhibited no activity.

Marilone A was evaluated against the Severe Acute Respiratory Syndrome coronavirus (SARS) and Hepatitis B virus but did not show any activity.

Marilone B was evaluated against the Herpes Simplex Virus-2 (HSV-2) and the Respiratory Syncytial virus (RSV) and exhibited no activity.

Marilone A was further tested against two antibiotic resistant *Mycobacterium tuberculosis* strains, MTB72 and R46 (tested at the 50 µg/mL disc level), but did not show any relevant activity.

Marilone C was tested in a panel of antidiabetic activity assays: PPAR ligand assay, PPAR co-activator assay, PTP-1B inhibitor assay and glucose uptake assay (both 3T3-11 cells and primary rat/mouse adipocytes, tested at the 100 µM dose), but did not show any activity.

Marilone C was tested for the inhibition of the NF-kB protein complex assay (at the 100 µM), but did not show any activity.

**Table S1:** 1D and 2D NMR spectroscopic data for compound **1**.

| position | $\delta_C$ , mult. <sup>a,b,e</sup> | $\delta_H$ <sup>a,b</sup> ( <i>J</i> in Hz)        | COSY <sup>a,c</sup> | HMBC <sup>a,d</sup>    |
|----------|-------------------------------------|----------------------------------------------------|---------------------|------------------------|
| 1        | 168.2, qC                           |                                                    |                     |                        |
| 2        | 110.0, qC                           |                                                    |                     |                        |
| 3        | 158.0, qC                           |                                                    |                     |                        |
| 4        | 120.4, qC                           |                                                    |                     |                        |
| 5        | 164.2, qC                           |                                                    |                     |                        |
| 6        | 100.8, CH                           | 6.95, s                                            |                     | 2, 3, 4, 5, 7, 8       |
| 7        | 154.2, qC                           |                                                    |                     |                        |
| 8        | 77.0, CH                            | 5.43, q (6.6)                                      | 11                  | 1, 2, 6, 7, 11         |
| 9        | 62.1, CH <sub>3</sub>               | 3.98, s                                            |                     | 3                      |
| 10       | 8.8, CH <sub>3</sub>                | 2.09, s                                            |                     | 3, 4, 5                |
| 11       | 20.9, CH <sub>3</sub>               | 1.54, d (6.6)                                      | 8                   | 7, 8                   |
| 1'       | 66.5, CH <sub>2</sub>               | a: 4.69, dd (6.6, 12.1)<br>b: 4.74, dd (6.6, 12.1) | 1'b, 2'<br>1'a, 2'  | 5, 2', 3'<br>5, 2', 3' |
| 2'       | 120.1, CH                           | 5.52, t (6.6)                                      | 1'a, 1'b, 9'        | 1', 4', 9'             |
| 3'       | 142.1, qC                           |                                                    |                     |                        |
| 4'       | 40.1, CH <sub>2</sub>               | 2.10, m                                            | 5'                  | 2', 6'                 |
| 5'       | 26.9, CH <sub>2</sub>               | 2.13, m                                            | 4', 6'              | 3', 4', 6', 7'         |
| 6'       | 124.64, CH                          | 5.09, m                                            | 4', 5', 8', 10'     | 4', 5', 8'             |
| 7'       | 132.1, qC                           |                                                    |                     |                        |
| 8'       | 25.8, CH <sub>3</sub>               | 1.63, br s                                         | 6'                  | 6', 7'                 |
| 9'       | 16.7, CH <sub>3</sub>               | 1.76, br s                                         | 2'                  | 2', 3', 4'             |
| 10'      | 17.7, CH <sub>3</sub>               | 1.58, br s                                         | 6'                  | 6', 7'                 |

<sup>a</sup>CD<sub>3</sub>COCD<sub>3</sub>, 300/75.5 MHz. <sup>b</sup>Assignments are based on extensive 1D and 2D NMR experiments (HMBC, HSQC, COSY). <sup>c</sup>Numbers refer to proton resonances. <sup>d</sup>Numbers refer to carbon resonances. <sup>e</sup>Implied multiplicities determined by DEPT.

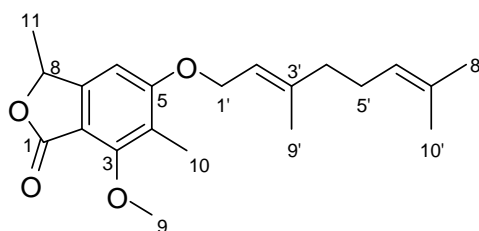

**Table S2:**  $^1\text{D}$  and  $^2\text{D}$  NMR spectroscopic data for compound **2**.

| position | $\delta_{\text{C}}$ , mult. <sup>a,b,e</sup> | $\delta_{\text{H}}$ <sup>a,b</sup> ( $J$ in Hz) | COSY <sup>a,c</sup> | HMBC <sup>a,d</sup> |
|----------|----------------------------------------------|-------------------------------------------------|---------------------|---------------------|
| 1        | 168.2, qC                                    |                                                 |                     |                     |
| 2        | 109.1, qC                                    |                                                 |                     |                     |
| 3        | 158.9, qC                                    |                                                 |                     |                     |
| 4        | 118.8, qC                                    |                                                 |                     |                     |
| 5        | 163.2, qC                                    |                                                 |                     |                     |
| 6        | 103.6, CH                                    | 6.73, s                                         |                     | 2, 3, 4, 5, 8       |
| 7        | 153.9, qC                                    |                                                 |                     |                     |
| 8        | 76.6, CH                                     | 5.43, q (6.6)                                   | 11                  | 1, 2, 6, 7, 11      |
| 9        | 62.0, CH <sub>3</sub>                        | 3.89, s                                         |                     | 3                   |
| 10       | 8.6, CH <sub>3</sub>                         | 2.02, s                                         |                     | 3, 4, 5             |
| 11       | 21.0, CH <sub>3</sub>                        | 1.44, d (6.6)                                   | 8                   | 7, 8                |

<sup>a</sup>MeOD, 300/75.5 MHz. <sup>b</sup>Assignments are based on extensive 1D and 2D NMR experiments (HMBC, HSQC, COSY). <sup>c</sup>Numbers refer to proton resonances. <sup>d</sup>Numbers refer to carbon resonances. <sup>e</sup>Implied multiplicities determined by DEPT.

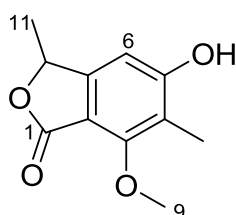

**Table S3:**  $^1\text{D}$  and  $^2\text{D}$  NMR spectroscopic data for compound **3**.

| position | $\delta_{\text{C}}$ , mult. <sup>a,b,e</sup> | $\delta_{\text{H}}$ <sup>a,b</sup> ( <i>J</i> in Hz) | COSY <sup>a,c</sup> | HMBC <sup>a,d</sup> |
|----------|----------------------------------------------|------------------------------------------------------|---------------------|---------------------|
| 1        | 68.9, CH <sub>2</sub>                        | 5.50, s                                              |                     | 2, 3, 5, 7, 8       |
| 2        | 128.4, qC                                    |                                                      |                     |                     |
| 3        | 153.9, qC                                    |                                                      |                     |                     |
| 4        | 124.8, qC                                    |                                                      |                     |                     |
| 5        | 159.7, qC                                    |                                                      |                     |                     |
| 6        | 102.0, CH                                    | 7.03, s                                              |                     | 2, 3, 4, 5, 7, 8    |
| 7        | 125.8, qC                                    |                                                      |                     |                     |
| 8        | 171.1, qC                                    |                                                      |                     |                     |
| 9        | 59.3, CH <sub>3</sub>                        | 3.96, s                                              |                     | 3                   |
| 10       | 9.8, CH <sub>3</sub>                         | 2.15, s                                              |                     | 3, 4, 5             |
| 1'       | 66.4, CH <sub>2</sub>                        | 4.71, d (6.6)                                        | 2'                  | 5, 2', 3'           |
| 2'       | 120.5, CH                                    | 5.51, t (6.6)                                        | 1', 9'              | 4', 9'              |
| 3'       | 141.6, qC                                    |                                                      |                     |                     |
| 4'       | 40.1, CH <sub>2</sub>                        | 2.10, m                                              |                     | 2', 3', 6'          |
| 5'       | 26.9, CH <sub>2</sub>                        | 2.14, m                                              | 4', 6'              | 3', 4', 6', 7'      |
| 6'       | 124.6, CH                                    | 5.10, m                                              | 4', 5', 8', 10'     | 4', 8', 10'         |
| 7'       | 132.05, qC                                   |                                                      |                     |                     |
| 8'       | 25.8, CH <sub>3</sub>                        | 1.63, br s                                           | 6'                  | 6', 7', 10'         |
| 9'       | 16.7, CH <sub>3</sub>                        | 1.78, br s                                           | 2'                  | 2', 3', 4'          |
| 10'      | 17.7, CH <sub>3</sub>                        | 1.58, br s                                           | 6'                  | 6', 7', 8'          |

<sup>a</sup>CD<sub>3</sub>COCD<sub>3</sub>, 300/75.5 MHz. <sup>b</sup>Assignments are based on extensive 1D and 2D NMR experiments (HMBC, HSQC, COSY). <sup>c</sup>Numbers refer to proton resonances. <sup>d</sup>Numbers refer to carbon resonances. <sup>e</sup>Implied multiplicities determined by DEPT.

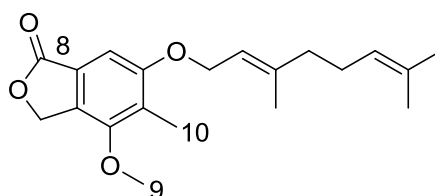

**Table S4:**  $^1\text{H}$  NMR spectroscopic data comparison of compound **4** with silvaticol and nidulol.

| $^1\text{H}$ NMR ( $\text{CDCl}_3$ ) |                   |                         |                      |
|--------------------------------------|-------------------|-------------------------|----------------------|
| Position                             | Compound <b>4</b> | Silvaticol <sup>1</sup> | Nidulol <sup>1</sup> |
| 1                                    |                   |                         |                      |
| 2                                    |                   |                         |                      |
| 3                                    |                   |                         |                      |
| 4                                    |                   |                         |                      |
| 5                                    |                   |                         |                      |
| 6                                    | <b>7.05</b>       | <b>7.04</b>             | <b>6.59</b>          |
| 7                                    |                   |                         |                      |
| 8                                    | 5.39              | 5.39                    | 5.15                 |
| 9                                    | 3.90              | 3.91                    | 4.08                 |
| 10                                   | 2.23              | 2.23                    | 2.19                 |

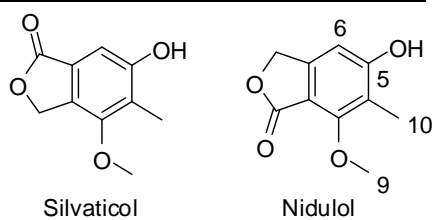

1. Kawahara, N.; Nozawa, K.; Nakajima, S.; Udagawa, S.; Kawai, K. *Chem. Pharm. Bull.* **1988**, *36*, 398-400.



**Table S5:**  $^1\text{H}$  NMR spectroscopic data comparison of compounds **1** and **3** with silvaticol and nidulol derivatives.

| $^1\text{H}$ NMR ( $\text{CDCl}_3$ ) |             |             |                                                                     |                                                                     |
|--------------------------------------|-------------|-------------|---------------------------------------------------------------------|---------------------------------------------------------------------|
| position                             | <b>1</b>    | <b>3</b>    | 6-(3',3'-dimethylallyloxy)-4-methoxy-5-methylphthalide <sup>2</sup> | 5-(3',3'-dimethylallyloxy)-7-methoxy-6-methylphthalide <sup>2</sup> |
| 1                                    |             |             |                                                                     |                                                                     |
| 2                                    |             |             |                                                                     |                                                                     |
| 3                                    |             |             |                                                                     |                                                                     |
| 4                                    |             |             |                                                                     |                                                                     |
| 5                                    |             |             |                                                                     |                                                                     |
| 6                                    | <b>6.54</b> | <b>7.05</b> | <b>7.08</b>                                                         | <b>6.62</b>                                                         |
| 7                                    |             |             |                                                                     |                                                                     |
| Protons at                           |             |             |                                                                     |                                                                     |
| C-1/C8                               | 5.39        | 5.39        | 5.38                                                                | 5.18                                                                |
| 9                                    | 4.04        | 3.90        | 3.89                                                                | 4.03                                                                |
| 10                                   | 2.18        | 2.23        | 2.21                                                                | 2.15                                                                |
|                                      |             |             | silvaticol derivative                                               | nidulol derivative                                                  |

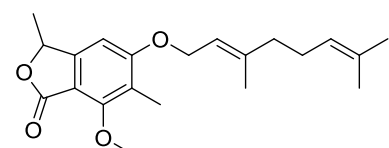

Compound 1

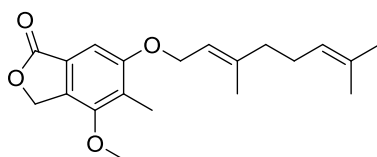

Compound 3

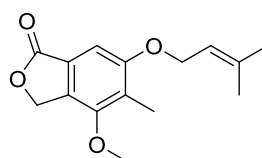

silvaticol derivative

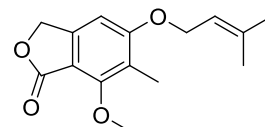

nidulol derivative

2. Suemitsu, R.; Ohnishi, K.; Morikawa, Y.; Nagamoto, S. *Phytochemistry* **1995**, *38*, 495-497.

**Figure S15:** Tetraketide nature of the phthalides nidulol (A) and silvaticol (B), and hypothetical biosynthetic pathways (C, D) for marilones A and B (1, 2).

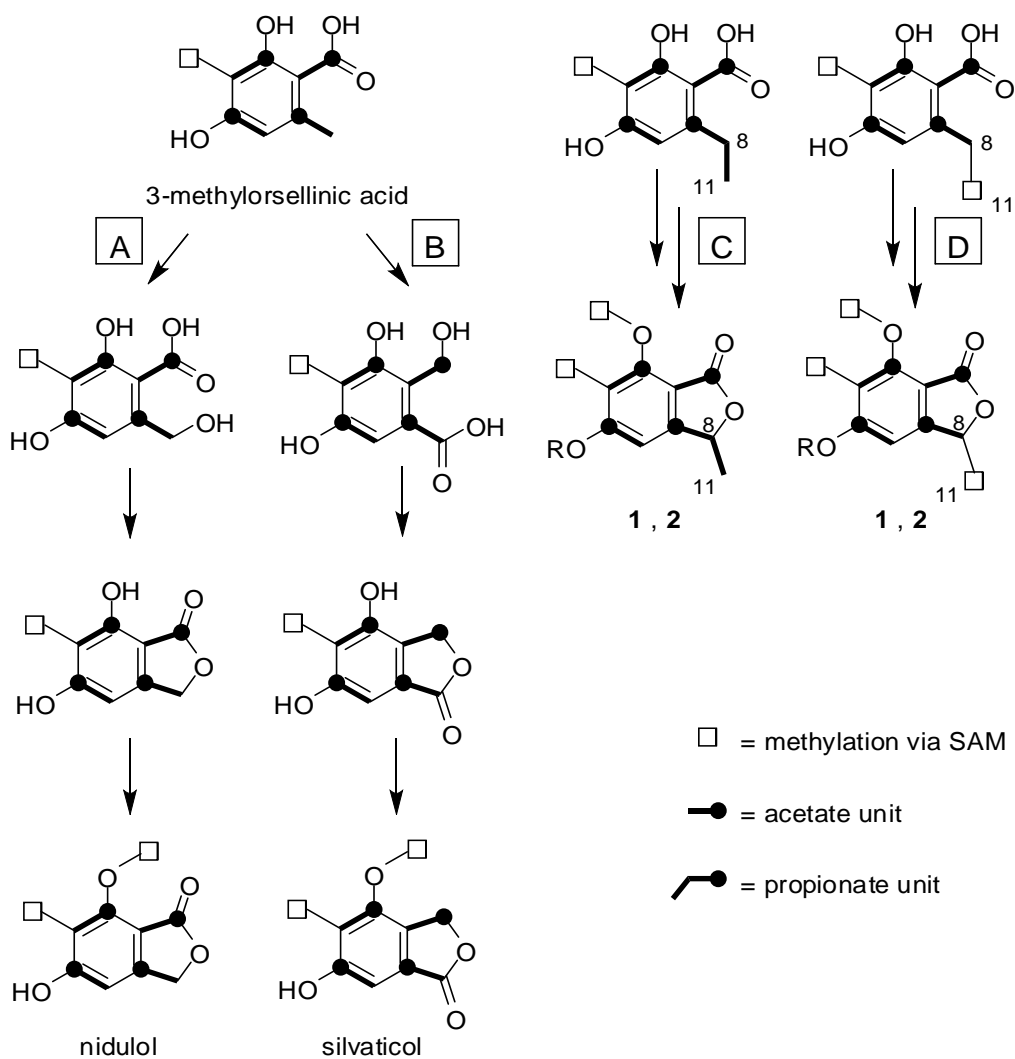

Supplement: Additional file 1 [file 1860-5397-7-192-S1.pdf]
